# Supplementary material for: Seasonal Variations of Polyphenols Content, Sun Protection Factor and Antioxidant Activity of Two Lamiaceae Species
Source: PubMed Central journal article supplement (PMC7829895; doi:10.3390/pharmaceutics13010110), 2021-01-16
Supplement: pharmaceutics-13-00110-s001.pdf [file pharmaceutics-13-00110-s001.pdf]

## Supplementary Materials: Seasonal Variations of Polyphenols Content, Sun Protection Factor and Antioxidant Activity of Two Lamiaceae Species

Juliana de Medeiros Gomes, Márcio Vinícius Cahino Terto, Sócrates Golzio do Santos, Marcelo Sobral da Silva and Josean Fechine Tavares \*

**Table S1.** Results of month-to-month quantification of rosmarinic acid in mg / g, *Mentha x villosa*.

| Months                | Jan   | Feb   | Mar   | Apr   | May   | Jun  | Jul   | Aug   | Setp  | Oct   | Nov   | Dec   |
|-----------------------|-------|-------|-------|-------|-------|------|-------|-------|-------|-------|-------|-------|
| TriPLICATE            | 37.16 | 14.85 | 12.4  | 31.38 | 22.73 | 7.66 | 17.5  | 28.89 | 39.7  | 26.18 | 24.52 | 32.97 |
|                       | 37.17 | 15.64 | 11.55 | 34.11 | 23.05 | 7.12 | 18.04 | 28.38 | 38.92 | 28.46 | 25.46 | 31.1  |
|                       | 37.52 | 15.76 | 12.45 | 33.36 | 22.52 | 7.29 | 18.4  | 28.29 | 39.23 | 26.66 | 25.81 | 33.04 |
| <b>Mean</b>           | 37.29 | 15.42 | 12.21 | 32.95 | 22.77 | 7.35 | 17.98 | 28.52 | 39.28 | 27.1  | 25.26 | 32.37 |
| <b>Error</b>          | 0.21  | 0.49  | 0.58  | 1.41  | 0.27  | 0.28 | 0.45  | 0.32  | 0.39  | 1.2   | 0.67  | 1.1   |
| <b>Relative error</b> | 0.56  | 3.21  | 4.77  | 4.28  | 1.17  | 3.74 | 2.5   | 1.14  | 1     | 4.44  | 2.64  | 3.39  |

**Table S2.** Results of month-to-month quantification of rosmarinic acid in mg / g, *Plectranthus amboinicus*.

| Months                | Jan   | Feb  | Mar   | Apr   | May   | Jun   | Jul   | Aug   | Setp  | Oct   | Nov   | Dec   |
|-----------------------|-------|------|-------|-------|-------|-------|-------|-------|-------|-------|-------|-------|
| TriPLICATE            | 39.3  | 6.03 | 24.52 | 29.1  | 35.65 | 41.09 | 37.79 | 28.33 | 32.37 | 41.82 | 44.65 | 42.91 |
|                       | 42.22 | 6.12 | 25.82 | 28.65 | 38.66 | 41.5  | 41.44 | 28.08 | 32.55 | 43.2  | 44.38 | 44.12 |
|                       | 40.4  | 5.86 | 25.83 | 29.95 | 37.92 | 42.9  | 39.02 | 28.86 | 32.54 | 39.52 | 43.7  | 44.18 |
| <b>Mean</b>           | 40.64 | 6    | 25.39 | 29.23 | 37.41 | 41.83 | 39.46 | 28.43 | 32.49 | 41.51 | 44.24 | 43.73 |
| <b>Error</b>          | 1.47  | 0.14 | 0.76  | 0.66  | 1.57  | 0.95  | 1.92  | 0.4   | 0.1   | 1.86  | 0.49  | 0.71  |
| <b>Relative error</b> | 3.63  | 2.25 | 2.98  | 2.26  | 4.19  | 2.27  | 4.87  | 1.42  | 0.32  | 4.48  | 1.11  | 1.63  |

**Table S3.** SPF results month by month, *Mentha x villosa*.

| Months                | Jan   | Feb   | Mar   | Apr   | May   | Jun  | Jul  | Aug   | Setp  | Oct   | Nov   | Dec   |
|-----------------------|-------|-------|-------|-------|-------|------|------|-------|-------|-------|-------|-------|
| TriPLICATE            | 13.05 | 10    | 10.08 | 12.2  | 10.81 | 9.03 | 9.15 | 11.65 | 13.6  | 13.26 | 12.52 | 11.82 |
|                       | 12.94 | 10.58 | 10.14 | 12.7  | 10.93 | 9.54 | 9.81 | 11.72 | 13.78 | 13.2  | 12.61 | 11.91 |
|                       | 13.31 | 10.38 | 10.23 | 12.77 | 10.96 | 9.55 | 9.87 | 11.75 | 13.81 | 12.93 | 12.67 | 11.93 |
| <b>Mean</b>           | 13.1  | 10.32 | 10.15 | 12.55 | 10.9  | 9.38 | 9.61 | 11.71 | 13.73 | 13.13 | 12.6  | 11.89 |
| <b>Error</b>          | 0.19  | 0.29  | 0.08  | 0.31  | 0.08  | 0.3  | 0.4  | 0.05  | 0.12  | 0.18  | 0.07  | 0.06  |
| <b>Relative error</b> | 1.45  | 2.81  | 0.75  | 2.5   | 0.71  | 3.15 | 4.15 | 0.46  | 0.84  | 1.34  | 0.59  | 0.52  |

**Table S4.** SPF results month by month, *Plectranthus amboinicus*.

| Months                | Jan   | Feb  | Mar   | Apr   | May   | Jun   | Jul   | Aug   | Setp  | Oct   | Nov   | Dec   |
|-----------------------|-------|------|-------|-------|-------|-------|-------|-------|-------|-------|-------|-------|
| TriPLICATE            | 12.58 | 9.77 | 11.04 | 13.28 | 13.92 | 13.52 | 14.67 | 10.5  | 11.89 | 11.19 | 11.78 | 11.81 |
|                       | 12.26 | 9.85 | 11.12 | 13.4  | 14.18 | 13.62 | 14.82 | 10.56 | 12.25 | 11.3  | 11.92 | 11.91 |
|                       | 12.6  | 9.91 | 11.15 | 13.45 | 13.52 | 13.65 | 14.88 | 10.61 | 12.3  | 11.35 | 12.55 | 11.93 |
| <b>Mean</b>           | 12.65 | 9.84 | 11.1  | 13.37 | 13.88 | 13.6  | 14.79 | 10.56 | 12.15 | 11.28 | 12.08 | 11.89 |
| <b>Error</b>          | 0.1   | 0.07 | 0.05  | 0.09  | 0.33  | 0.07  | 0.11  | 0.05  | 0.22  | 0.08  | 0.41  | 0.06  |
| <b>Relative error</b> | 0.8   | 0.73 | 0.5   | 0.67  | 2.4   | 0.5   | 0.75  | 0.5   | 1.85  | 0.74  | 3.4   | 0.52  |

**Table S5.** Results of total phenolic content month by month mg GAE/ g, *Mentha x villosa*.

| Months                | Jan    | Feb   | Mar   | Apr     | May    | Jun   | Jul    | Aug    | Setp   | Oct    | Nov    | Dec    |
|-----------------------|--------|-------|-------|---------|--------|-------|--------|--------|--------|--------|--------|--------|
| TriPLICATE            | 142.76 | 95.87 | 96.72 | 149.7   | 115.48 | 88.74 | 106.66 | 116.26 | 147.61 | 115.17 | 123.04 | 130.44 |
|                       | 142.65 | 94.94 | 91.6  | 143.27  | 108.31 | 88    | 107.11 | 113.16 | 146.06 | 120.6  | 124.63 | 133.54 |
|                       | 139.7  | 95.94 | 94.9  | 141.721 | 108.27 | 91.22 | 107.42 | 118.7  | 147.42 | 120.79 | 125.13 | 132.57 |
| <b>Mean</b>           | 141.7  | 95.58 | 94.41 | 144.9   | 110.69 | 89.32 | 107.06 | 116.04 | 147.03 | 118.85 | 124.27 | 132.19 |
| <b>Error</b>          | 1.73   | 0.56  | 2.59  | 4.23    | 4.15   | 1.68  | 0.38   | 2.78   | 0.84   | 0.64   | 1.09   | 1.59   |
| <b>Relative error</b> | 1.22   | 0.59  | 2.75  | 2.92    | 3.75   | 1.89  | 0.35   | 2.39   | 0.57   | 0.54   | 0.88   | 1.2    |

**Table S6.** Results of the total phenolic content month by month mg GAE/g, *Plectranthus amboinicus*.

| Months                | Jan    | Feb   | Mar    | Apr   | May    | Jun    | Jul    | Aug    | Setp   | Oct    | Nov    | Dec    |
|-----------------------|--------|-------|--------|-------|--------|--------|--------|--------|--------|--------|--------|--------|
| TriPLICATE            | 115.44 | 79.16 | 102.84 | 118.5 | 134.51 | 129.01 | 163.12 | 114.86 | 118.19 | 146.88 | 126.49 | 141.33 |
|                       | 115.21 | 79.59 | 103.31 | 121.8 | 131.76 | 129.16 | 167.54 | 110.07 | 116.26 | 152.96 | 126.06 | 134.43 |
|                       | 115.64 | 79.47 | 103    | 111.6 | 133.31 | 134.36 | 163.46 | 121.41 | 118.19 | 148.31 | 126.18 | 132.3  |
| <b>Mean</b>           | 115.43 | 79.41 | 103.05 | 117.3 | 133.19 | 130.84 | 164.7  | 115.43 | 117.55 | 149.38 | 126.24 | 136.02 |
| <b>Error</b>          | 0.21   | 0.22  | 0.24   | 5.2   | 1.38   | 3.04   | 2.46   | 5.72   | 1.12   | 3.18   | 0.22   | 4.72   |
| <b>Relative error</b> | 0.18   | 0.28  | 0.23   | 4.43  | 1.03   | 2.33   | 1.49   | 4.95   | 0.95   | 2.13   | 0.17   | 3.47   |

**Table S7.** Results of total flavonoid content month by month mg querc/ g, *Mentha x villosa*.

| Months                | Jan   | Feb   | Mar   | Apr   | May   | Jun | Jul   | Aug   | Sept  | Oct   | Nov   | Dec   |
|-----------------------|-------|-------|-------|-------|-------|-----|-------|-------|-------|-------|-------|-------|
| TriPLICATE            | 16.21 | 15.73 | 18.26 | 29.44 | 10.49 | Nd  | 21.49 | 24.52 | 20.06 | 16.92 | 21.38 | 20.76 |
|                       | 16.46 | 15.25 | 18.23 | 27.59 | 10.09 | Nd  | 21.57 | 25.57 | 21.19 | 17.64 | 22.02 | 20.2  |
|                       | 17.51 | 15.33 | 18.4  | 29.12 | 10.41 | Nd  | 21.57 | 25.49 | 21.35 | 18.37 | 22.59 | 20.03 |
| <b>Mean</b>           | 16.73 | 15.44 | 18.3  | 28.72 | 10.33 | Nd  | 21.54 | 25.2  | 20.87 | 17.64 | 22    | 20.33 |
| <b>Error</b>          | 0.68  | 0.26  | 0.09  | 0.99  | 0.21  | Nd  | 0.05  | 0.58  | 0.7   | 0.72  | 0.6   | 0.38  |
| <b>Relative error</b> | 4.1   | 1.68  | 0.47  | 3.45  | 2.06  | Nd  | 0.22  | 2.32  | 3.37  | 4.11  | 2.75  | 1.87  |

\*Nd = Not detected.

**Table S8.** Results of total flavonoid content month by month mg querc/ g, *Plectranthus amboinicus*.

| Months                | Jan   | Feb   | Mar   | Apr   | May   | Jun   | Jul   | Aug   | Sept  | Oct   | Nov   | Dec   |
|-----------------------|-------|-------|-------|-------|-------|-------|-------|-------|-------|-------|-------|-------|
| TriPLICATE            | 37.18 | 19.39 | 38.56 | 45.46 | 42.29 | 41.81 | 46.4  | 30.79 | 38.37 | 38.8  | 46.01 | 49.77 |
|                       | 37.1  | 19.22 | 39.68 | 45.87 | 40.2  | 42.37 | 46.08 | 31.51 | 38.21 | 38.23 | 46.4  | 49.77 |
|                       | 37.99 | 19.39 | 38.96 | 45.22 | 41.81 | 41.89 | 46.01 | 32    | 40.3  | 38.31 | 46.49 | 49.83 |
| <b>Mean</b>           | 37.43 | 19.34 | 39.07 | 45.52 | 41.43 | 42.02 | 46.16 | 31.43 | 38.96 | 38.45 | 46.3  | 49.82 |
| <b>Error</b>          | 0.49  | 0.09  | 0.57  | 0.32  | 1.1   | 0.3   | 0.21  | 0.61  | 1.17  | 0.3   | 0.26  | 0.09  |
| <b>Relative error</b> | 1.31  | 0.48  | 1.46  | 0.72  | 2.65  | 0.73  | 0.46  | 1.94  | 2.99  | 0.79  | 0.56  | 0.19  |

**Table S9.** EC<sub>50</sub> results month by month in µg/ml, *Mentha x villosa*.

| Months                | Jan   | Feb    | Mar    | Apr   | May    | Jun    | Jul    | Aug   | Setp  | Oct    | Nov   | Dec   |
|-----------------------|-------|--------|--------|-------|--------|--------|--------|-------|-------|--------|-------|-------|
| TriPLICATE            | 76.47 | 114.78 | 117.96 | 80.7  | 104.29 | 153.76 | 105.31 | 94.99 | 79.85 | 99.96  | 85.18 | 75.73 |
|                       | 7446  | 116.11 | 122.15 | 79.89 | 106.14 | 150.1  | 105.99 | 97.09 | 79.59 | 101.88 | 86.59 | 73.88 |
|                       | 77.06 | 114.67 | 123.14 | 82.64 | 105.42 | 150.5  | 107.65 | 95.16 | 80.3  | 100.44 | 87.67 | 75.66 |
| <b>Mean</b>           | 75.99 | 115.19 | 121.08 | 81.08 | 105.28 | 151.45 | 106.32 | 95.74 | 79.91 | 100.76 | 86.48 | 75.09 |
| <b>Error</b>          | 1.37  | 0.8    | 2.75   | 1.41  | 0.93   | 2      | 1.2    | 1.17  | 0.36  | 1      | 1.25  | 1.04  |
| <b>Relative error</b> | 1.8   | 0.7    | 2.27   | 1.74  | 0.89   | 1.32   | 1.13   | 1.22  | 0.45  | 0.99   | 1.44  | 1.39  |

**Table S10.** EC<sub>50</sub> results month by month in µg/ml, *Plectranthus amboinicus*.

| Months         | Jan    | Feb    | Mar    | Apr   | May   | Jun   | Jul   | Aug    | Setp  | Oct   | Nov   | Dec   |
|----------------|--------|--------|--------|-------|-------|-------|-------|--------|-------|-------|-------|-------|
| TriPLICATE     | 108.69 | 218,25 | 106.09 | 92.07 | 95.16 | 96.42 | 86.69 | 122.95 | 94.62 | 85.62 | 90.87 | 86.22 |
|                | 114.57 | 223,83 | 110.5  | 93.38 | 95.43 | 96.07 | 86.7  | 120.28 | 93.94 | 84.62 | 89.49 | 87.3  |
|                | 112.96 | 219.04 | 104.64 | 93.39 | 95.12 | 95.56 | 87.73 | 117.77 | 95.88 | 84.88 | 89.5  | 87.04 |
| Mean           | 112.07 | 220.37 | 107.08 | 92.95 | 95.24 | 96.01 | 87.04 | 120.33 | 94.82 | 85.04 | 89.95 | 86.85 |
| Error          | 3.04   | 3.02   | 3.05   | 0.76  | 0.17  | 0.43  | 0.6   | 2.59   | 0.99  | 0.52  | 0.79  | 0.56  |
| Relative error | 2.72   | 1.37   | 2.85   | 0.81  | 0.18  | 0.45  | 0.68  | 2.15   | 1.04  | 0.61  | 0.88  | 0.64  |

**Table S11.** Radiation data used (kJ/m<sup>2</sup>).

| Months | Jan        | Feb        | Mar        | Apr        | May        | Jun        | Jul        | Aug        | Setp       | Oct        | Nov        | Dec        |
|--------|------------|------------|------------|------------|------------|------------|------------|------------|------------|------------|------------|------------|
| 1      | 197641.060 | 203520.460 | 181576.322 | 196133.069 | 154980.228 | 173300.573 | 164603.583 | 182309.039 | 177154.311 | 224129.173 | 221421.193 | 260510.439 |
| 2      | 201835.671 | 163412.757 | 144502.035 | 160850.620 | 171977.400 | 80859.9140 | 150842.713 | 150422.667 | 177392.423 | 189475.618 | 205187.561 | 191501.764 |
| 3      | 224238.660 | 182924.830 | 211545.221 | 190800.970 | 184121.131 | 170916.486 | 168212.962 | 219538.095 | 238614.400 | 228766.061 | 260510.439 | 254396.450 |

**Table S12.** Precipitation levels used (mm<sup>3</sup>).

| Months | Jan  | Feb   | Mar   | Apr  | May  | Jun   | Jul  | Aug  | Setp | Oct  | Nov | Dec  |
|--------|------|-------|-------|------|------|-------|------|------|------|------|-----|------|
| 1      | 2    | 38.4  | 36.6  | 83   | 90.2 | 73.6  | 85.4 | 21.8 | 34   | 0.2  | 0.2 | 0.2  |
| 2      | 1.8  | 111.6 | 103.2 | 41   | 22.8 | 554.2 | 52.4 | 27.2 | 11.8 | 27.4 | 0   | 13.6 |
| 3      | 32.6 | 2.6   | 109.2 | 71.4 | 71   | 101   | 225  | 30.6 | 24   | 4    | 0   | 5.6  |

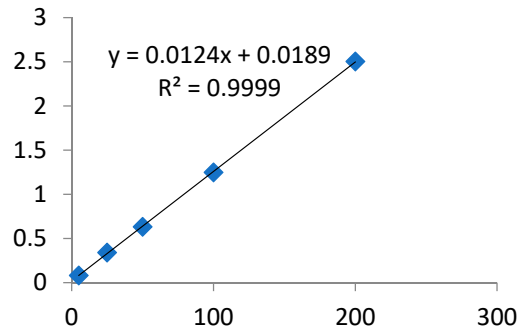

**Figure S1.** Calibration curve of Quercetin.

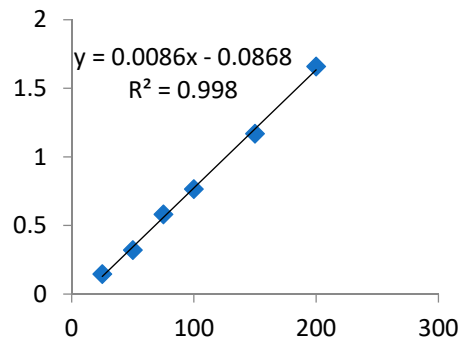

**Figure S2.** Calibration curve of Gallic acid standard.

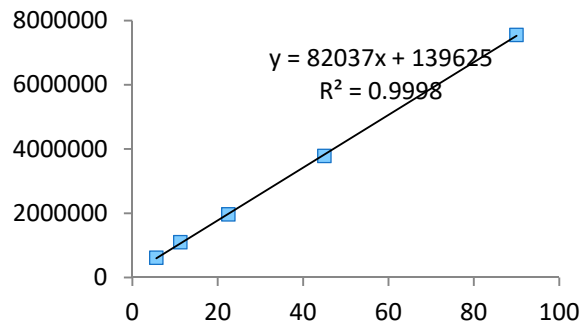

**Figure S3.** Rosmarinic acid standard linear regression for its quantification in *M. x villosa* and *P. amboinicus*.

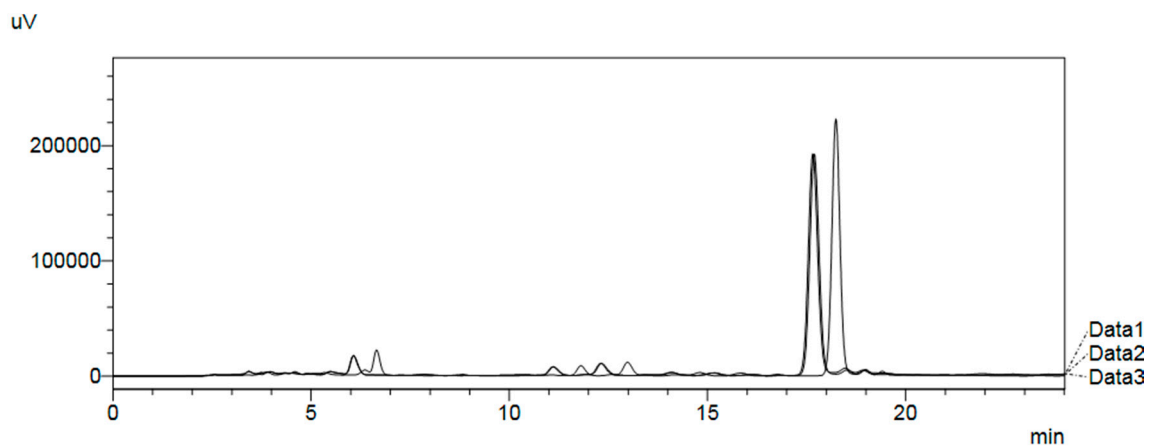

**Figure S4.** Superimposed chromatograms of rosmarinic acid triplicate (retention times at 18.24; 17.65; 17.69 min) for its quantification in January, *Mentha x villosa*.

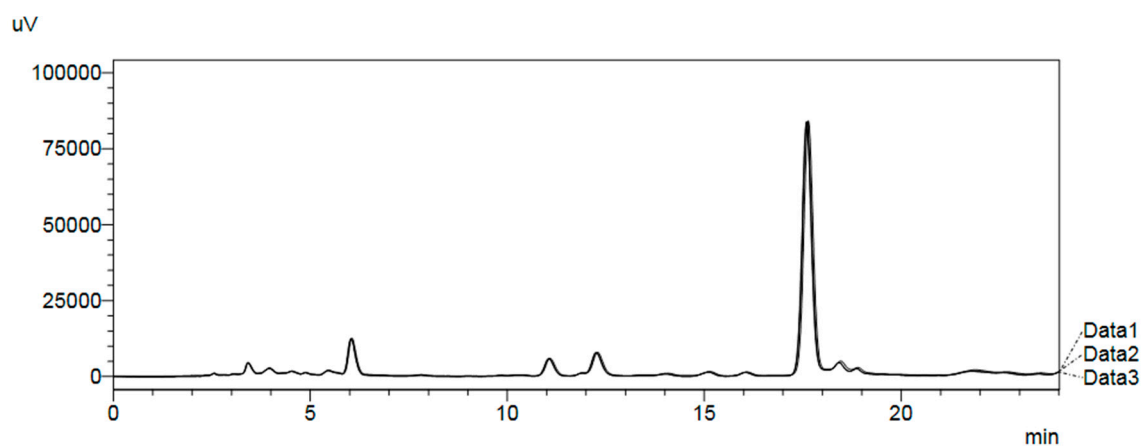

**Figure S5.** Superimposed chromatograms of rosmarinic acid triplicate (retention times approximately at 17.60 min) for its quantification in February, *Mentha x villosa*.

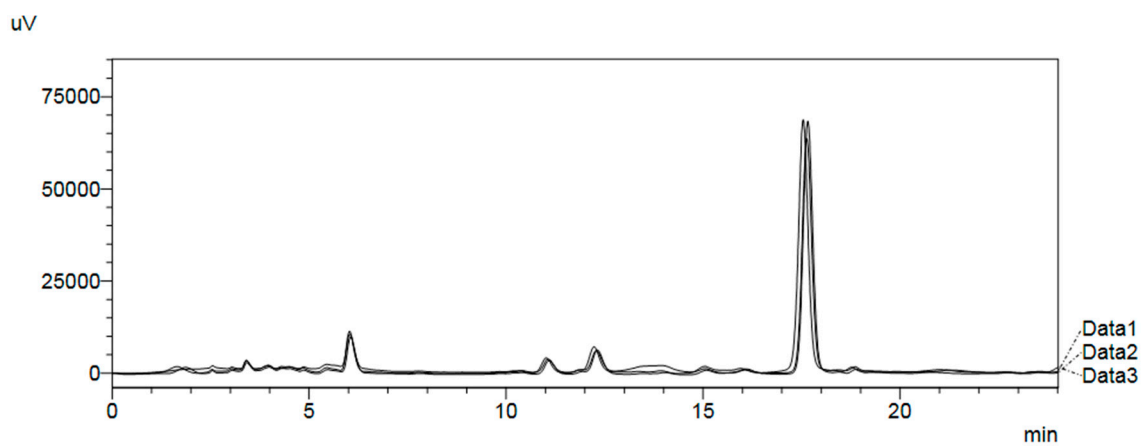

**Figure S6.** Superimposed chromatograms of rosmarinic acid triplicate (retention times approximately at 17.60 min) for its quantification in March, *Mentha x villosa*.

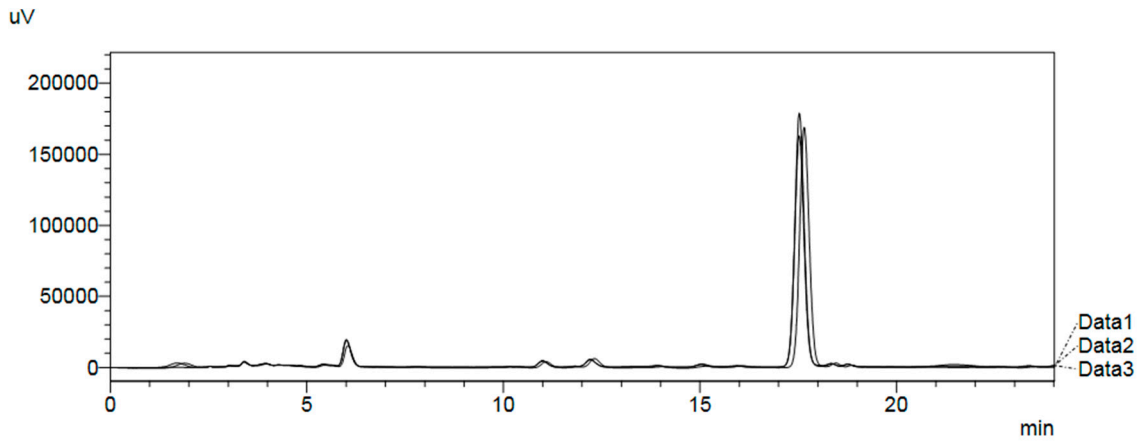

**Figure S7.** Superimposed chromatograms of rosmarinic acid triplicate (retention times at 17.65; 17.53; 17.52 min) for its quantification in April, *Mentha x villosa*.

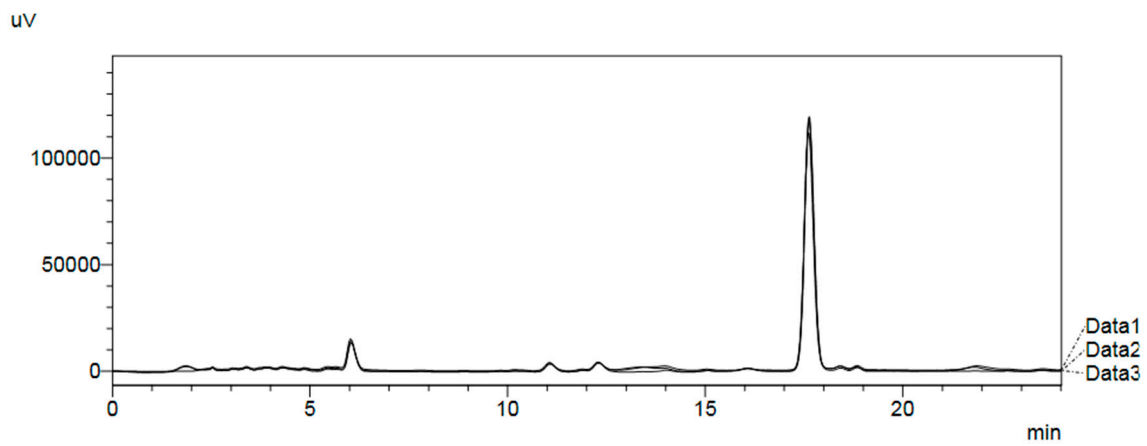

**Figure S8.** Superimposed chromatograms of rosmarinic acid triplicate (retention times approximately at 17.60 min) for its quantification in May, *Mentha x villosa*.

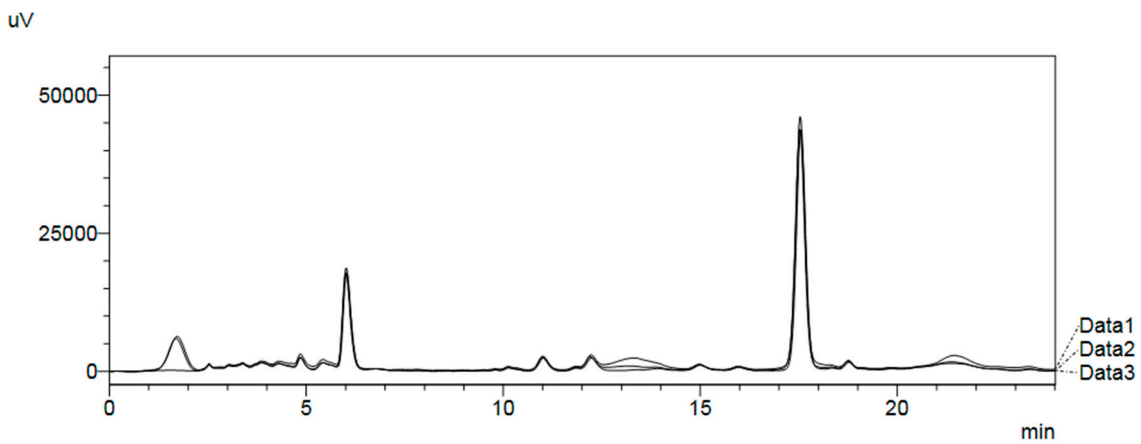

**Figure S9.** Superimposed chromatograms of rosmarinic acid triplicate (retention times approximately at 17.53 min) for its quantification in June, *Mentha x villosa*.

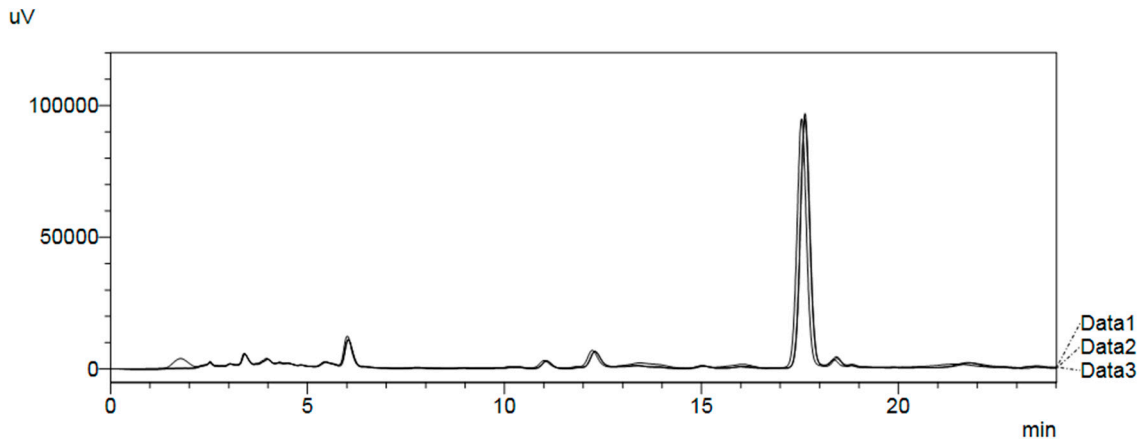

**Figure S10.** Superimposed chromatograms of rosmarinic acid triplicate (retention times approximately at 17.60 min) for its quantification in July, *Mentha x villosa*.

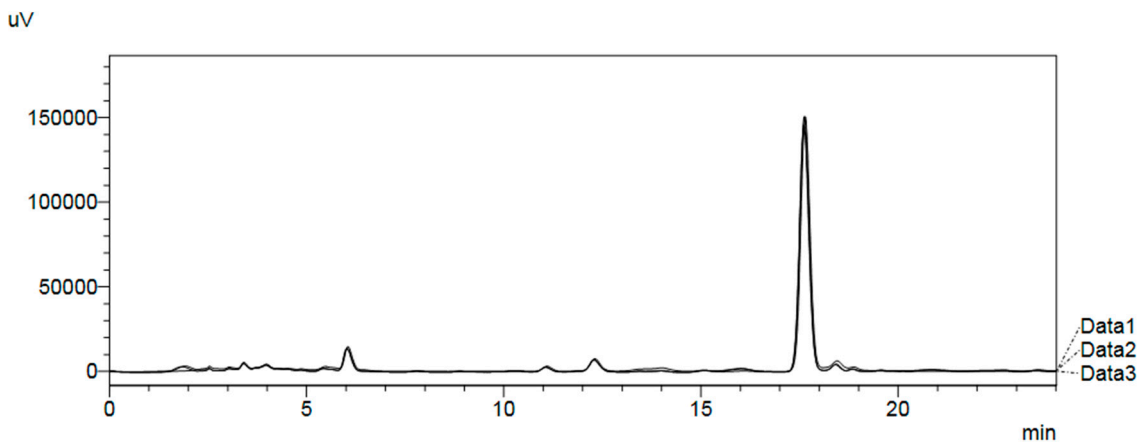

**Figure S11.** Superimposed chromatograms of rosmarinic acid triplicate (retention times approximately at 17.60 min) for its quantification in August, *Mentha x villosa*.

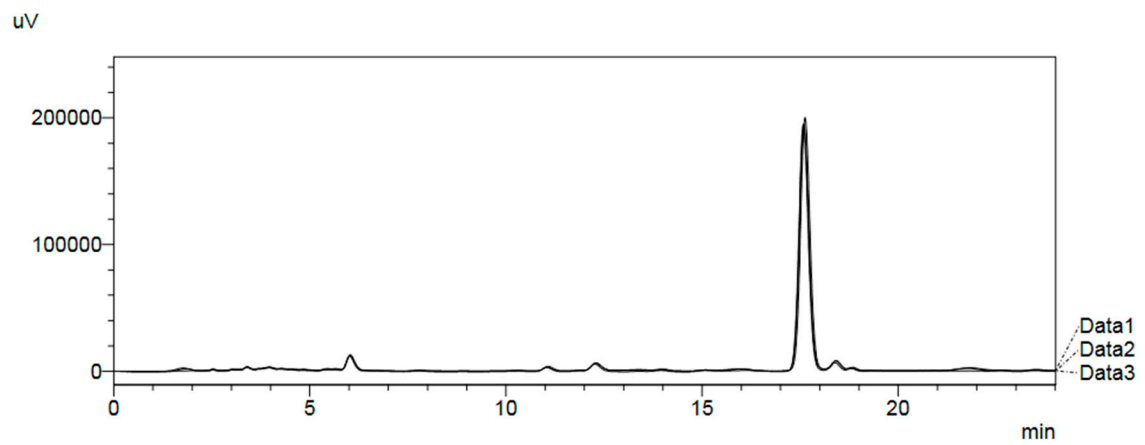

**Figure S12.** Superimposed chromatograms of rosmarinic acid triplicate (retention times approximately at 17.60 min) for its quantification in September, *Mentha x villosa*.



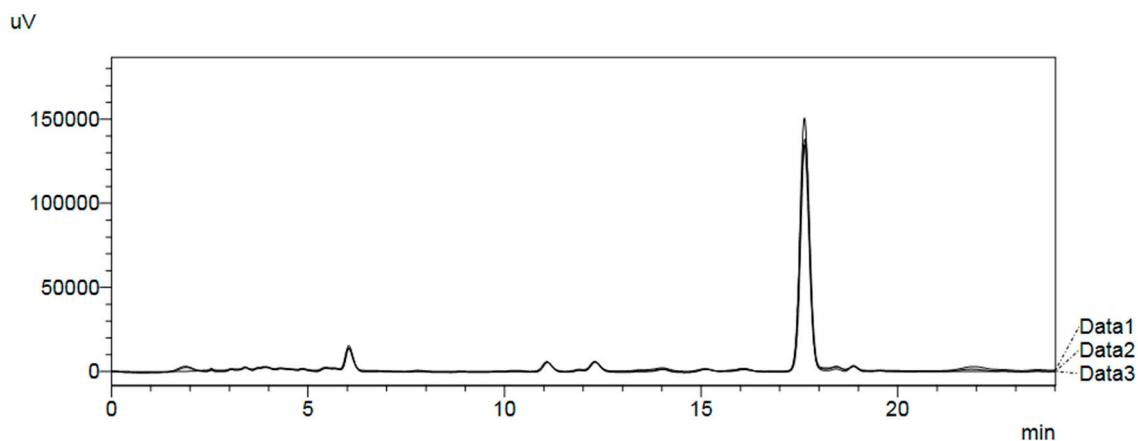

**Figure S13.** Superimposed chromatograms of rosmarinic acid triplicate (retention times approximately at 17.63 min) for its quantification in October, *Mentha x villosa*.

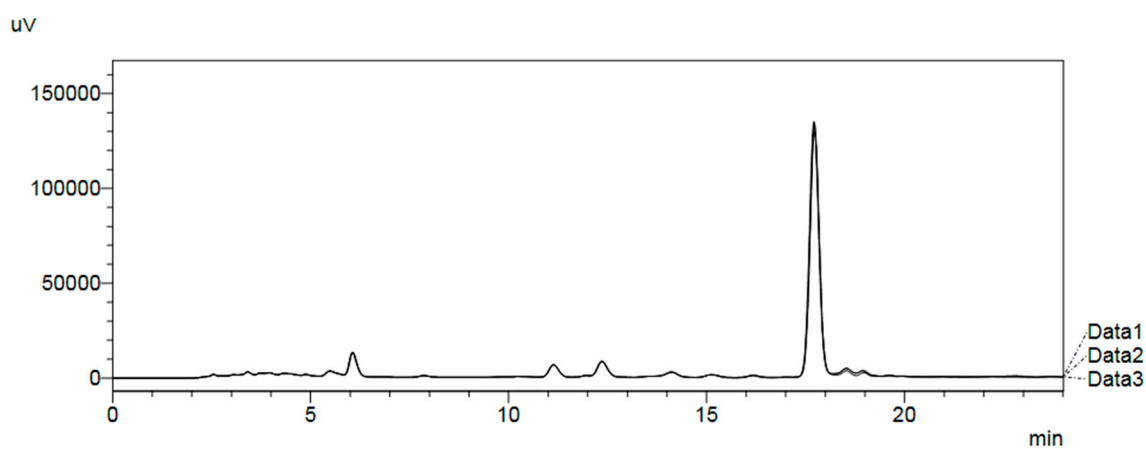

**Figure S14.** Superimposed chromatograms of rosmarinic acid triplicate (retention times approximately at 17.72 min) for its quantification in November, *Mentha x villosa*.

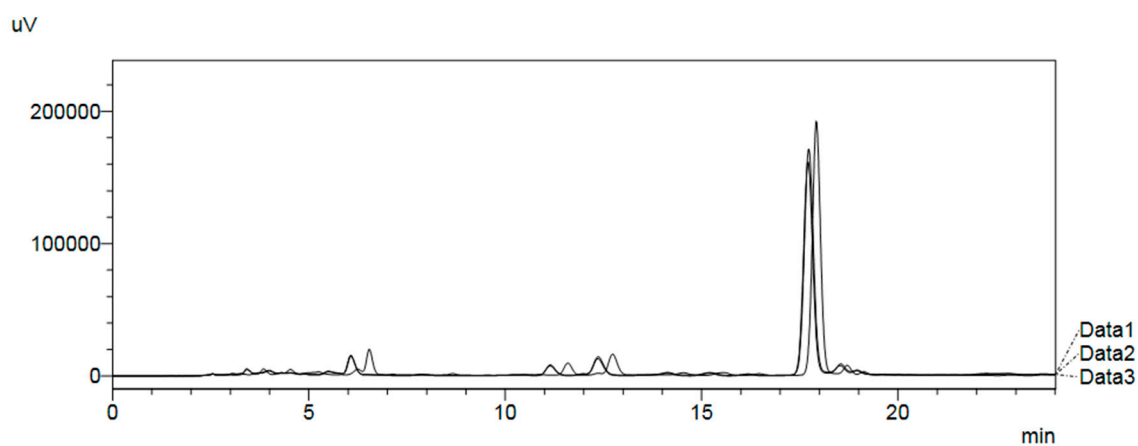

**Figure S15.** Superimposed chromatograms of rosmarinic acid triplicate (retention times at 17.72; 17.71; 17.92 min) for its quantification in December, *Mentha x villosa*.

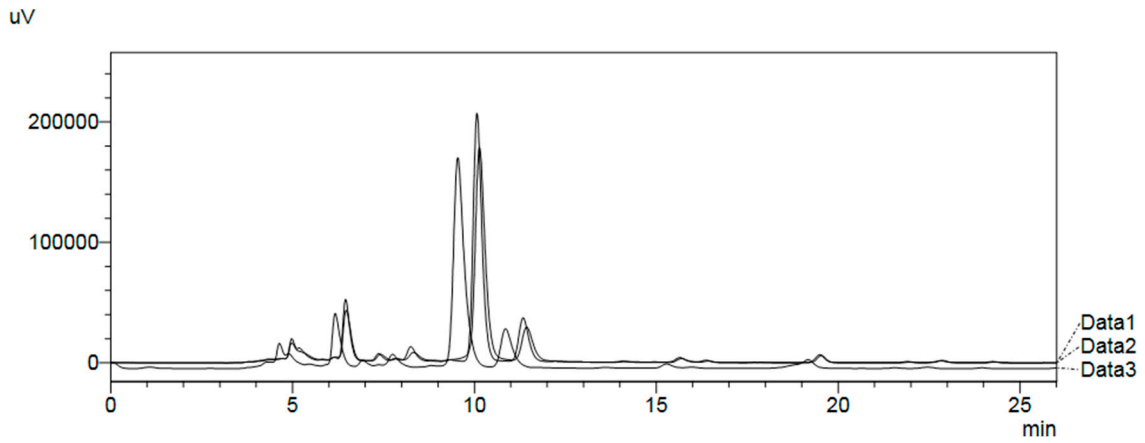

**Figure S16.** Superimposed chromatograms of rosmarinic acid triplicate (retention times at 10.07; 9.54; 10.07 min) for its quantification in January, *Pectranthus amboinicus*.

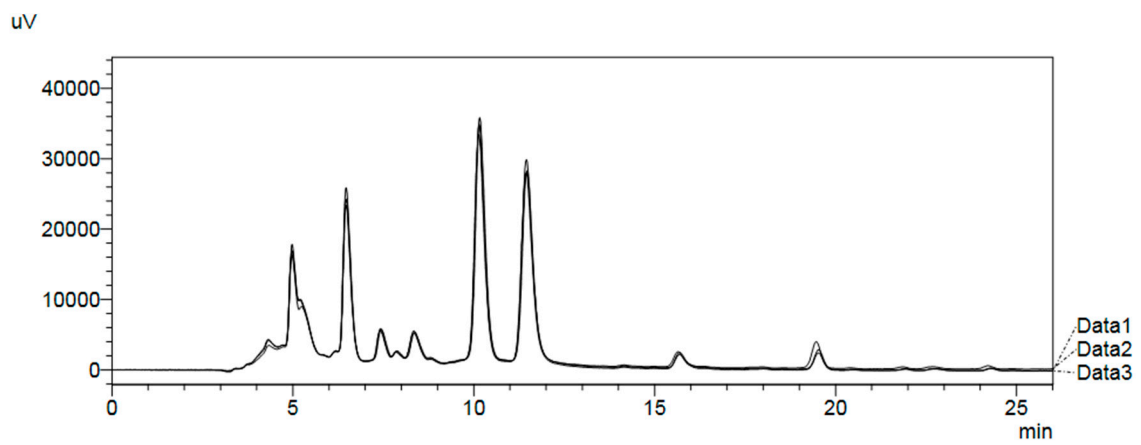

**Figure S17.** Superimposed chromatograms of rosmarinic acid triplicate (retention times approximately at 10.14 min) for its quantification in February, *Pectranthus amboinicus*.

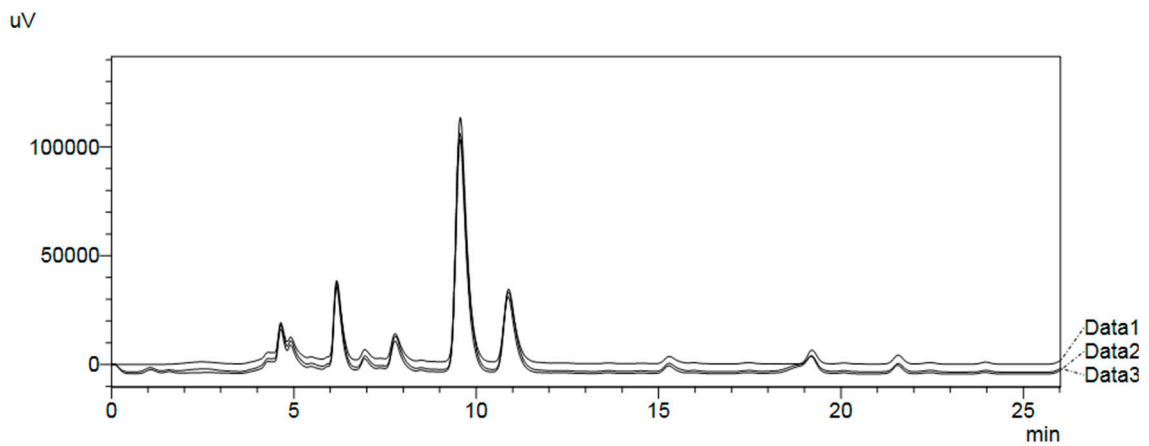

**Figure S18.** Superimposed chromatograms of rosmarinic acid triplicate (retention times approximately at 9.55 min) for its quantification in March, *Pectranthus amboinicus*.

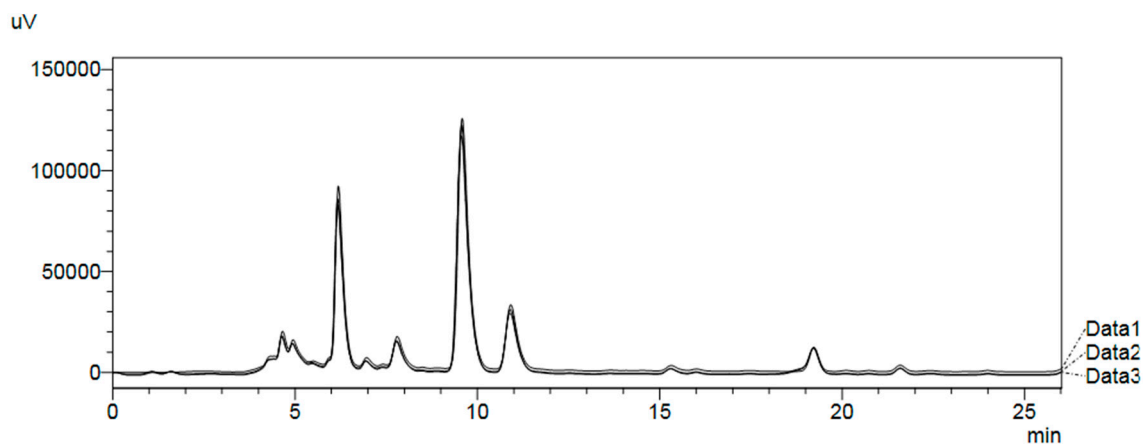

**Figure S19.** Superimposed chromatograms of rosmarinic acid triplicate (retention times approximately at 9.56 min) for its quantification in April, *Pectranthus amboinicus*.

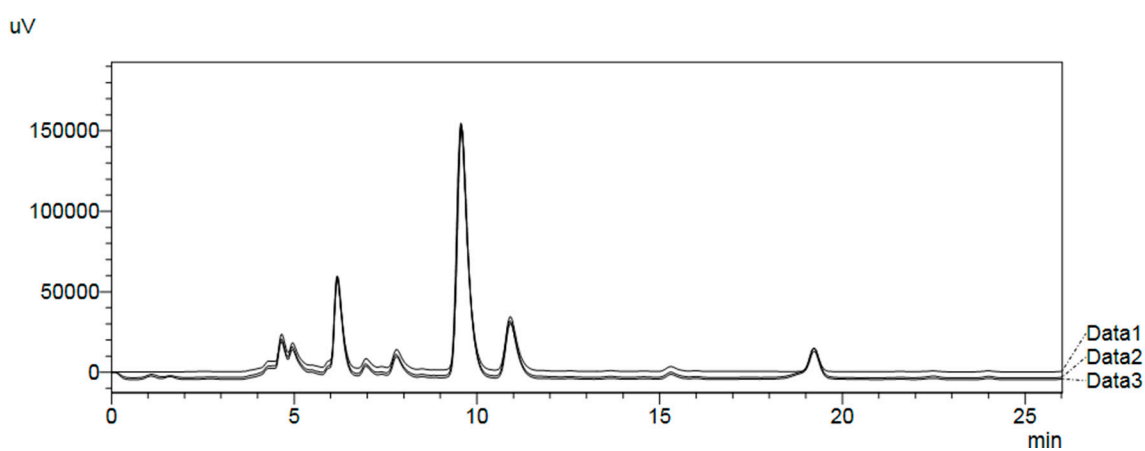

**Figure S20.** Superimposed chromatograms of rosmarinic acid triplicate (retention times approximately at 9.57 min) for its quantification in June, *Pectranthus amboinicus*.

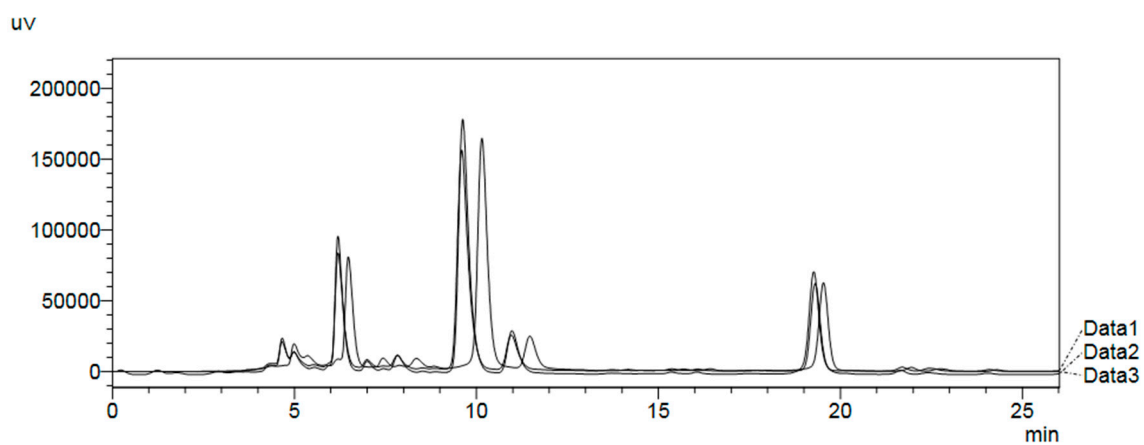

**Figure S21.** Superimposed chromatograms of rosmarinic acid triplicate (retention times at 9.60; 9.62; 10.15 min) for its quantification in July, *Pectranthus amboinicus*.

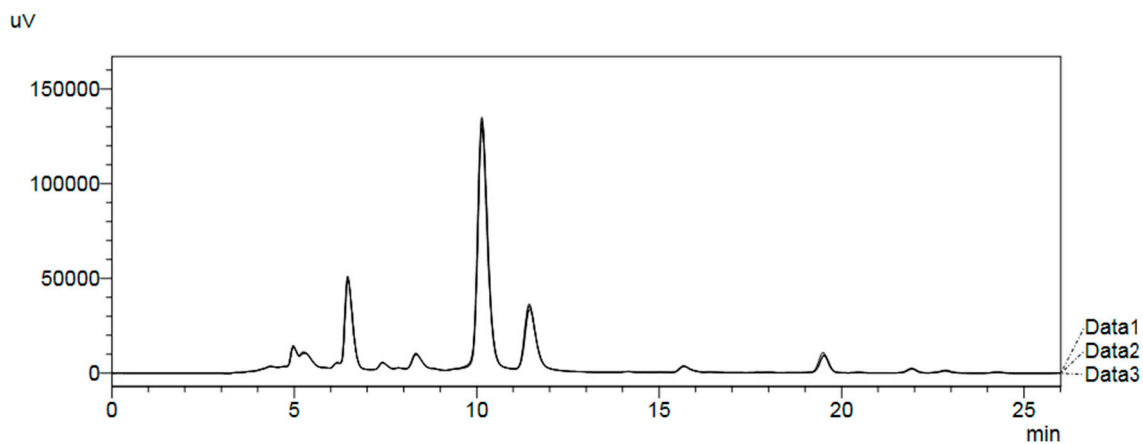

**Figure S22.** Superimposed chromatograms of rosmarinic acid triplicate (retention times approximately at 10.14 min) for its quantification in August, *Pectranthus amboinicus*.

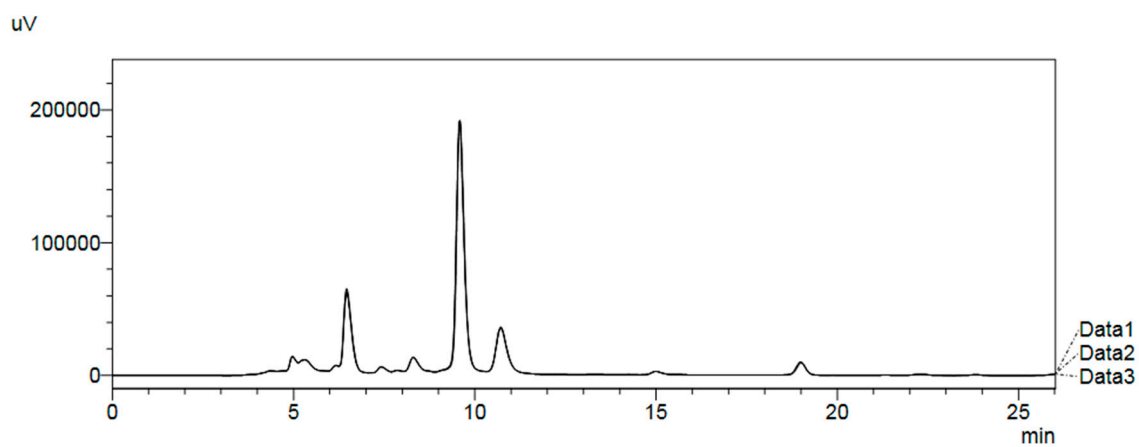

**Figure S23.** Superimposed chromatograms of rosmarinic acid triplicate (retention times approximately at 9.58 min) for its quantification in September, *Pectranthus amboinicus*.

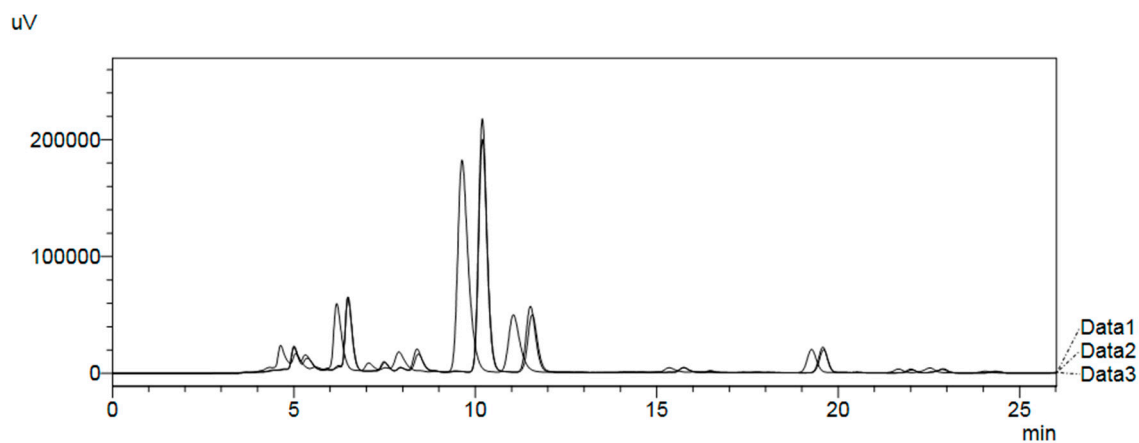

**Figure S24.** Superimposed chromatograms of rosmarinic acid triplicate (retention times at 9.64; 10.19; 10.19 min) for its quantification in October, *Pectranthus amboinicus*.

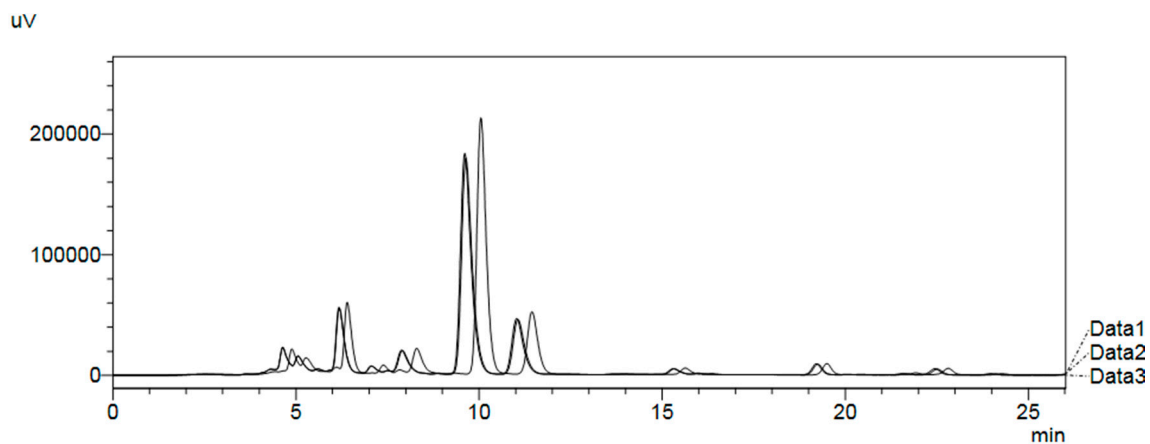

**Figure S25.** Superimposed chromatograms of rosmarinic acid triplicate (retention times at 10.05; 9.64; 9.61 min) for its quantification in November, *Pectranthus amboinicus*.

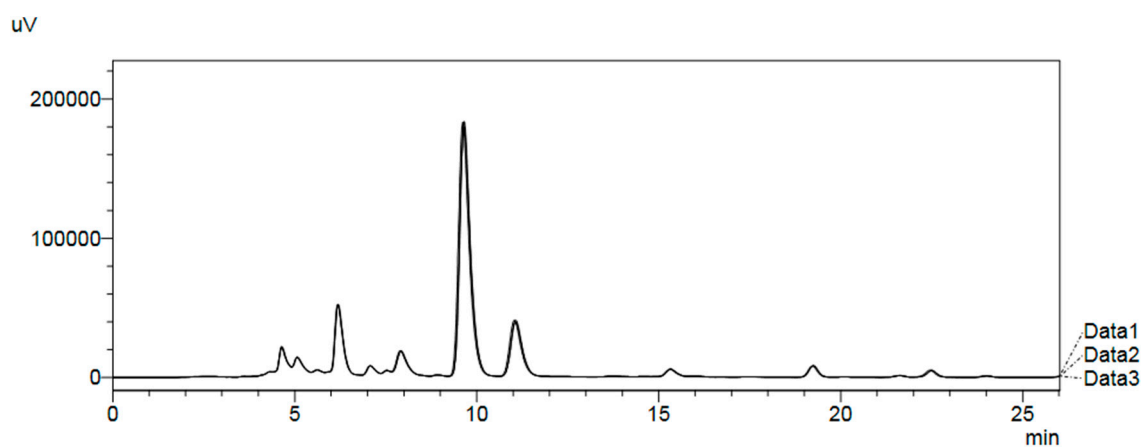

**Figure S26.** Superimposed chromatograms of rosmarinic acid triplicate (retention times approximately at 9.65 min) for its quantification in December, *Pectranthus amboinicus*.
